# Supplementary material for: Mechanism of CO2 photoreduction by selenium-doped carbon nitride with cobalt clusters as cocatalysts
Source: Royal Society of Chemistry journal article supplement (doi:10.1039/d2cp05872c), 2023-01-01
Supplement: d2cp05872c1.pdf [file d2cp05872c1.pdf]

## Supporting Information

### Mechanism of CO<sub>2</sub> Photoreduced by Selenium-doped Carbon Nitride with Cobalt Cluster as Cocatalyst

Yuanyuan Hu,<sup>a</sup> Ting Wu,<sup>a</sup> Yi Li,<sup>ab</sup> Yongfan Zhang,<sup>\*ab</sup> Wei Lin<sup>\*ab</sup>

<sup>a</sup> State Key Laboratory of Photocatalysis on Energy and Environment, College of Chemistry, Fuzhou University, Fuzhou 350108, P.R. China

<sup>b</sup> Fujian Provincial Key Laboratory of Theoretical and Computational Chemistry, Xiamen University, Xiamen, Fujian 361005, China

E-mail: zhangyf@fzu.edu.cn (Y. Zhang); wlin@fzu.edu.cn (W. Lin)

**Table S1.** The formation energy ( $E_{form}$ ) of different N and C sites doping systems.

| Site | $E_{form}$ (eV) | Site | $E_{form}$ (eV) |
|------|-----------------|------|-----------------|
| N1   | -0.37           | C1   | 3.64            |
| N2   | -0.54           | C2   | 4.00            |
| N3   | -0.44           | C3   | 3.43            |
| N4   | -0.25           | C4   | 3.95            |
| N5   | -0.50           | C5   | 3.56            |
| N6   | -0.33           | C6   | 4.08            |
| N7   | 0.25            |      |                 |

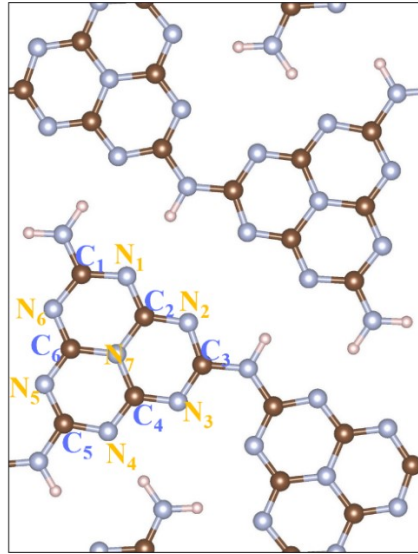

**Fig. S1.** The structural schematic diagrams of Se-decorated melon-based CN. The brown, grey, and light pink balls represent C, N, and H atoms, respectively.

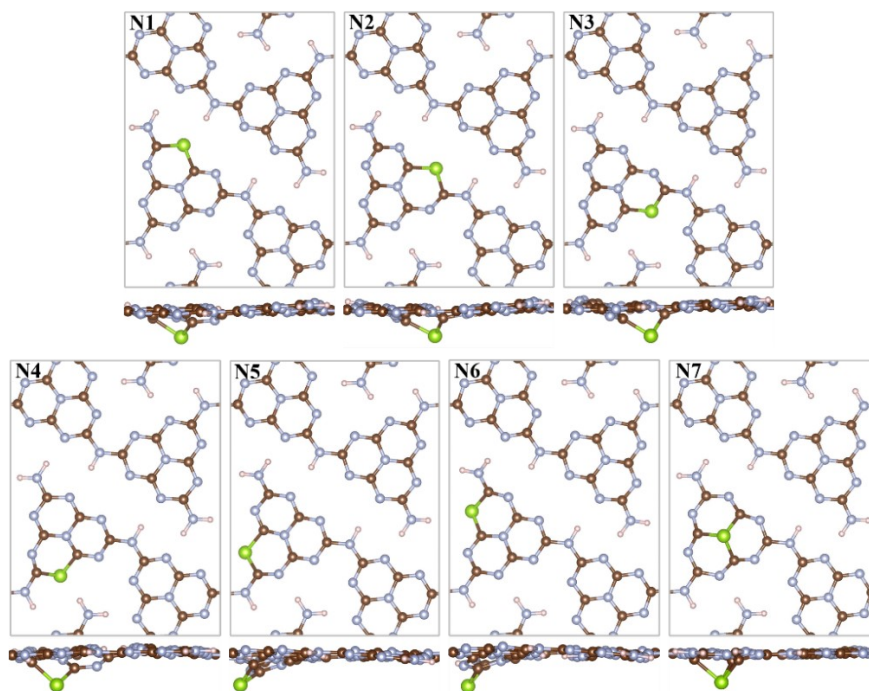

**Fig. S2.** Top and side views of geometric structure of Se-doped CN of the possible doping sites (N1, N2, N3, N4, N5, N6, N7). The brown, grey, light pink and green balls represent C, N, H and Se atoms, respectively.

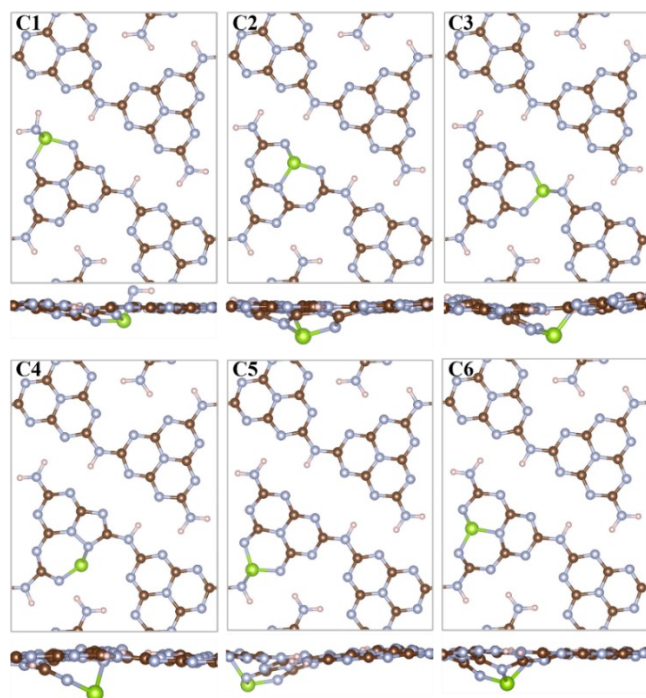

**Fig. S3.** Top and side views of geometric structure of Se-doped CN of the possible doping sites (C1, C2, C3, C4, C5, C6). The brown, grey, light pink and green balls represent C, N, H and Se atoms, respectively.

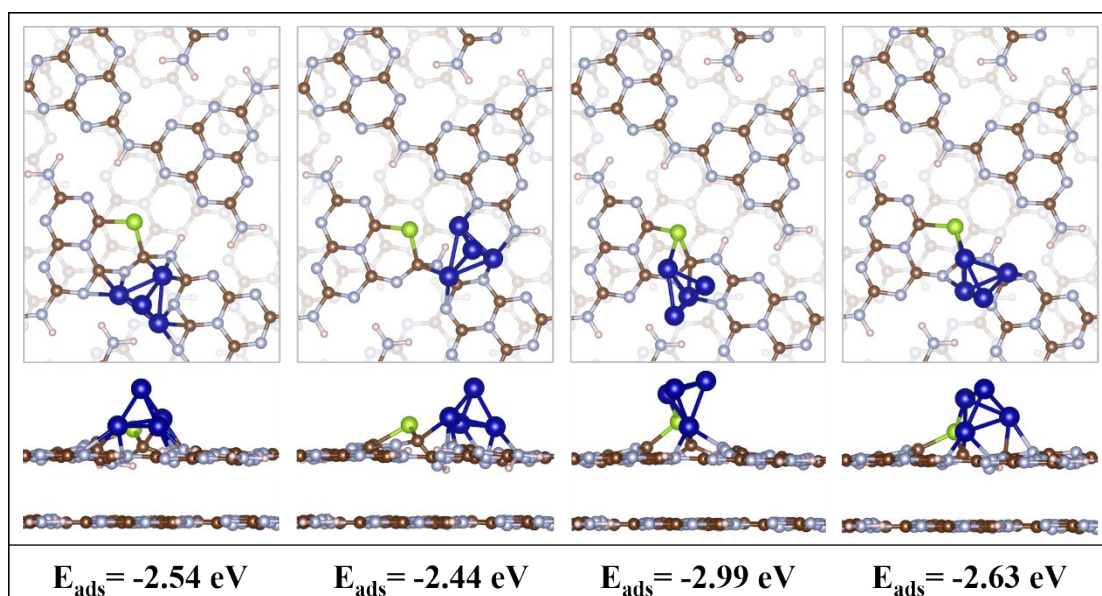

**Fig. S4.** Top and side views of geometric structure of  $\text{Co}_4@ \text{SeN}_2$ . The brown, grey, light pink, green and blue balls represent C, N, H, Se and Co atoms, respectively.

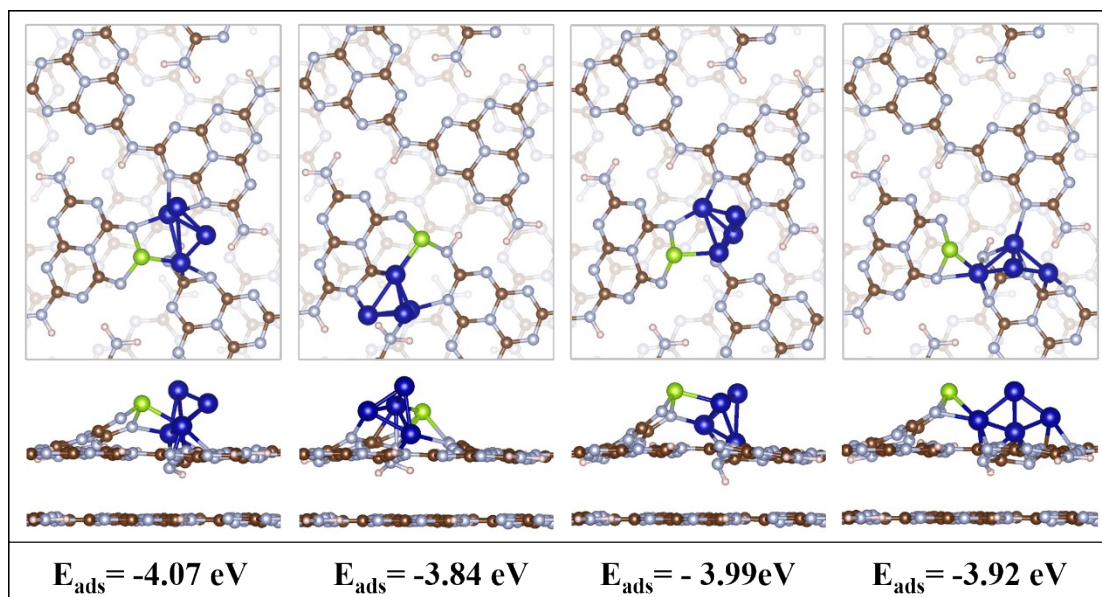

Fig. S5. Top and side views of geometric structure of  $\text{Co}_4@ \text{SeC}_3$ . The brown, grey, light pink, green and blue balls represent C, N, H, Se and Co atoms, respectively.

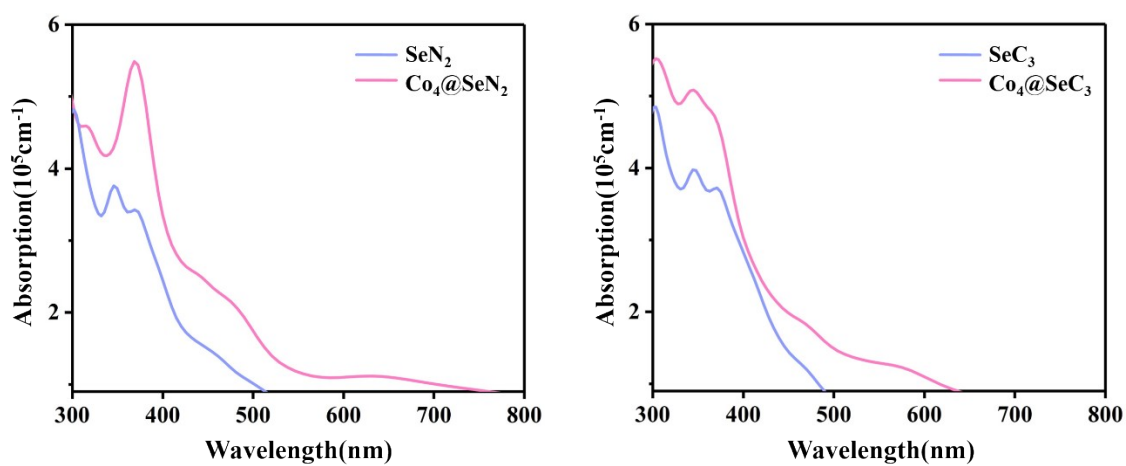

Fig. S6. Optical absorption behaviors of photocatalyst.

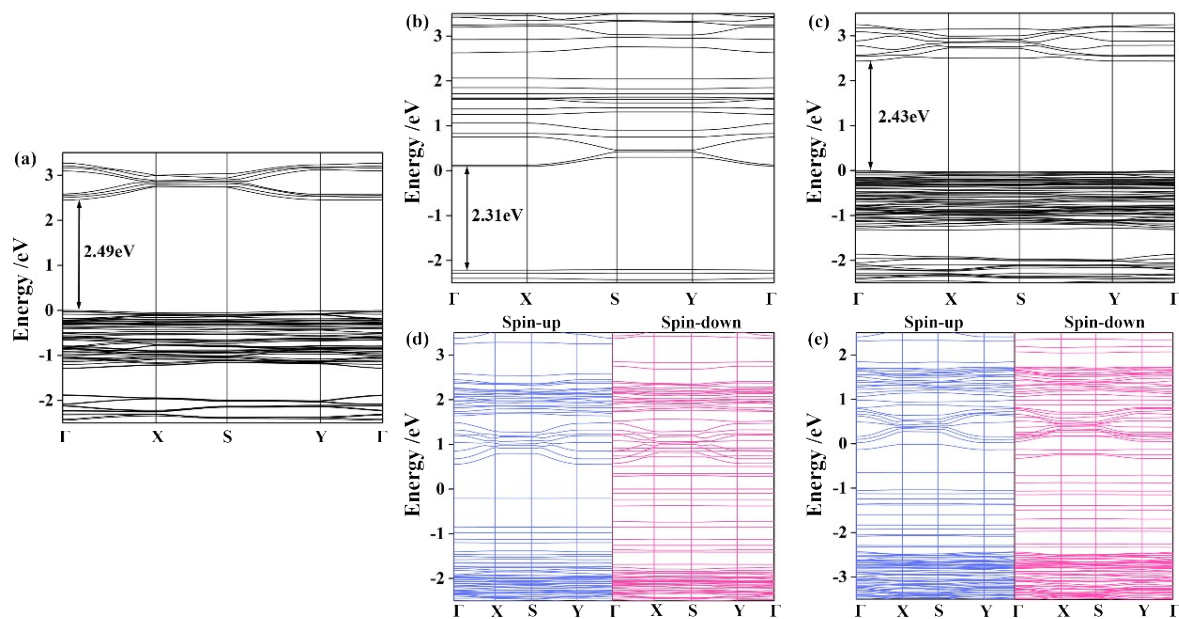

Fig. S7. Band structure of (a) pure melon (b)  $\text{SeN}_2$  (c)  $\text{SeC}_3$  (d)  $\text{Co}_4@ \text{SeN}_2$  and (e)  $\text{Co}_4@ \text{SeC}_3$ .

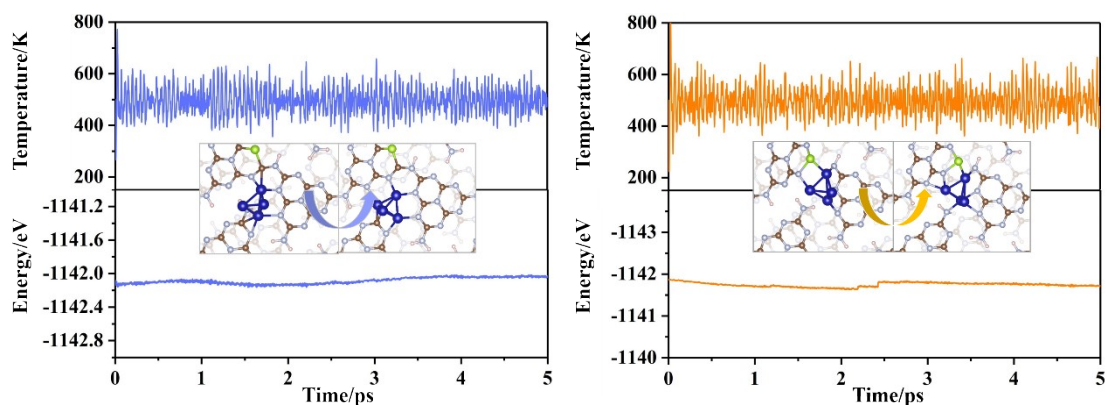

Fig. S8. Variations of temperature and energy as a function of (a)  $\text{Co}_4@ \text{SeN}_2$  (b)  $\text{Co}_4@ \text{SeC}_3$  the time for AIMD simulations of insert is top view of the snapshot of atomic configuration.



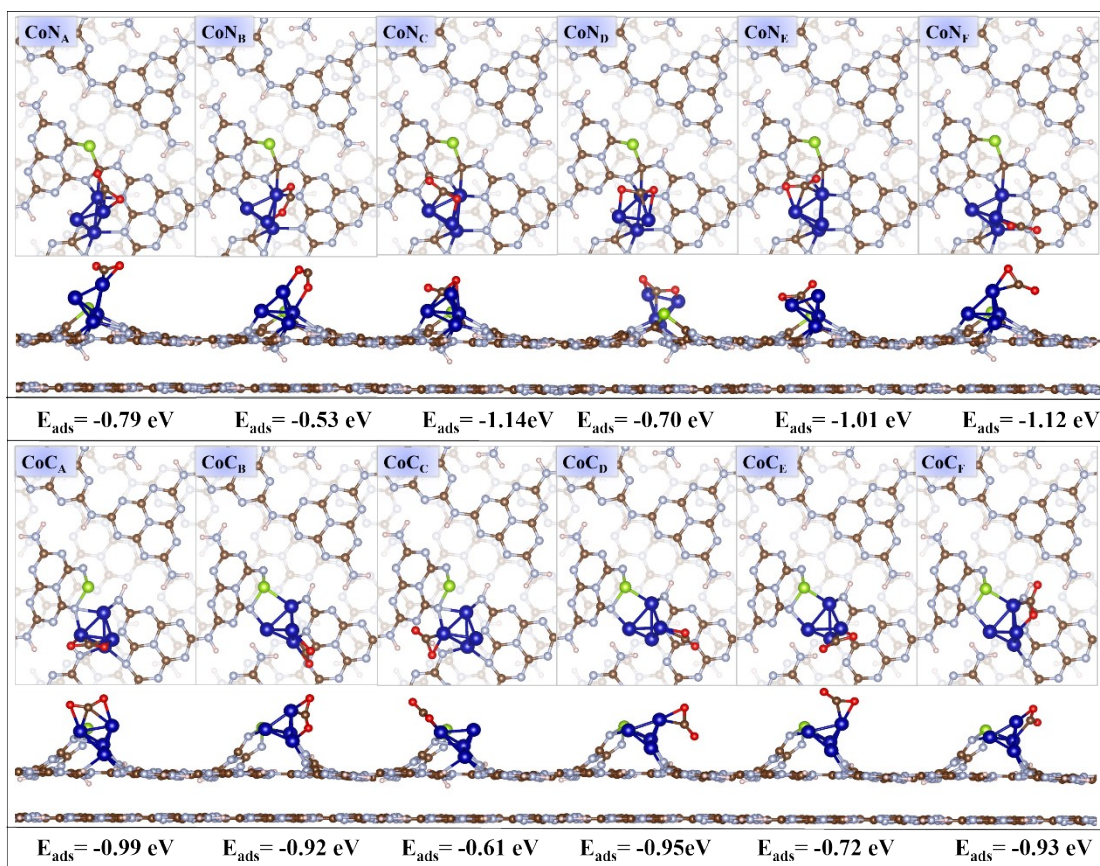

**Fig. S9.** The adsorption configuration of  $\text{CO}_2$ , where  $\text{CoN}_A$ - $\text{CoN}_F$  are the adsorption situations on  $\text{Co}_4@ \text{SeN}_2$ , and  $\text{CoC}_A$ - $\text{CoC}_F$  are the adsorption results on  $\text{Co}_4@ \text{SeC}_3$ .

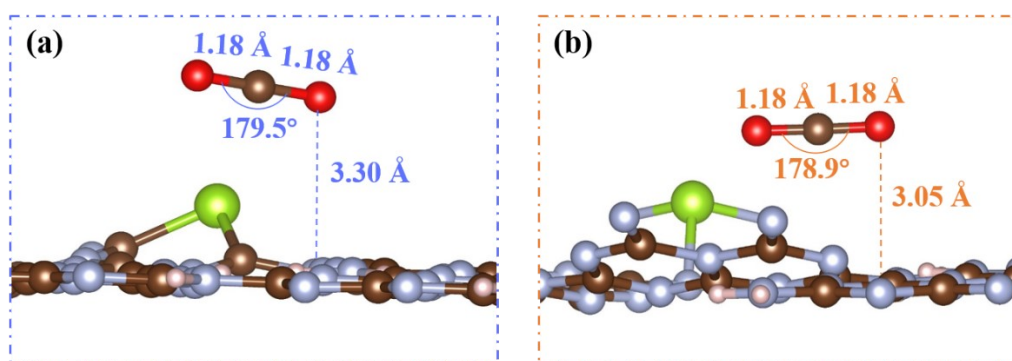

**Fig. S10.** The most stable adsorption configurations of  $\text{CO}_2$  in (a)  $\text{SeN}_2$  (b)  $\text{SeC}_3$ . The bluish violet frame indicates n-site doping, and the orange frame indicates C-site doping.

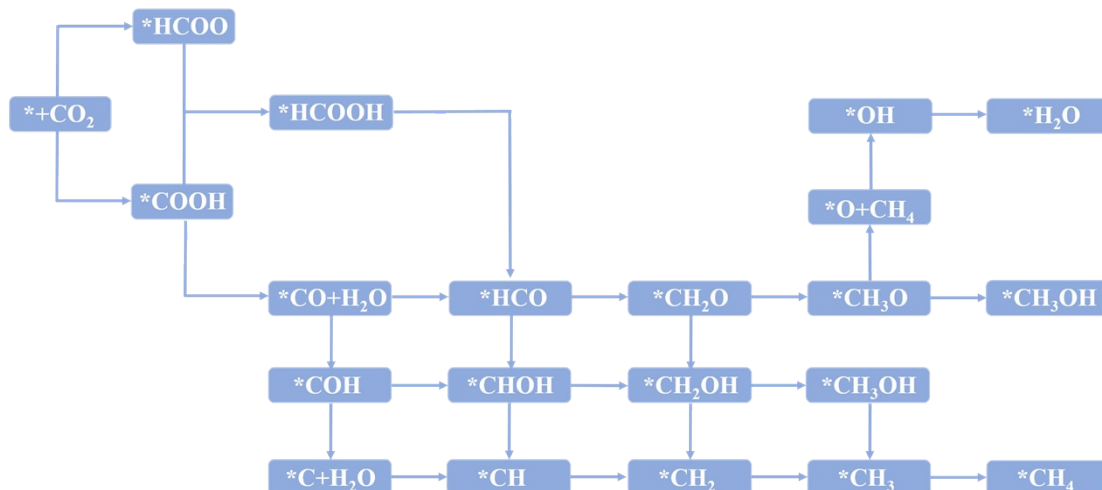

**Fig. S11.** All considered reaction pathways for CO<sub>2</sub> reduction.

Table S2. Calculated Gibbs free energies,  $T^*S$ , EZPE (in eV) of intermediates in complicated paths

| Co <sub>4</sub> @SeN <sub>2</sub> | Gibbs energies | $T^*S$ (eV) | $E_{ZPE}$ (eV) | Co <sub>4</sub> @SeC <sub>3</sub> | Gibbs energies | $T^*S$ (eV) | $E_{ZPE}$ (eV) |
|-----------------------------------|----------------|-------------|----------------|-----------------------------------|----------------|-------------|----------------|
| *CO <sub>2</sub>                  | 0.26           | 0.11        | 0.31           | *CO <sub>2</sub>                  | 0.39           | 0.18        | 0.30           |
| *COOH                             | 0.53           | 0.15        | 0.60           | *COOH                             | 0.57           | 0.13        | 0.62           |
| *HCOO                             | 0.45           | 0.16        | 0.64           | *HCOO                             | 0.65           | 0.18        | 0.73           |
| *HCOOH                            | 0.84           | 0.16        | 0.91           | *HCOOH                            | 0.93           | 0.48        | 1.15           |
| *CO                               | 0.17           | 0.08        | 0.20           | *CO                               | 0.16           | 0.10        | 0.21           |
| *COH                              | 0.45           | 0.11        | 0.49           | *COH                              | 0.42           | 0.14        | 0.49           |
| *CHO                              | 0.41           | 0.09        | 0.44           | *CHO                              | 0.37           | 0.13        | 0.43           |
| *C                                | 0.10           | 0.02        | 0.11           | *C                                | 0.22           | 0.04        | 0.23           |
| *CHOH                             | 0.71           | 0.14        | 0.77           | *CHOH                             | 0.74           | 0.13        | 0.78           |
| *CH <sub>2</sub> O                | 0.71           | 0.15        | 0.78           | *CH <sub>2</sub> O                | 0.72           | 0.13        | 0.79           |
| *CH <sub>2</sub> OH               | 1.01           | 0.15        | 1.08           | *CH <sub>2</sub> OH               | 1.01           | 0.16        | 1.09           |
| *CH <sub>3</sub> OH               | 1.33           | 0.21        | 1.43           | *CH <sub>3</sub> OH               | 1.04           | 0.27        | 1.18           |
| *CH <sub>3</sub> O                | 0.96           | 0.18        | 1.06           | *CH <sub>3</sub> O                | 1.03           | 0.16        | 1.11           |
| *CH                               | 0.34           | 0.14        | 0.40           | *CH                               | 0.37           | 0.03        | 0.38           |
| *CH <sub>2</sub>                  | 0.59           | 0.05        | 0.60           | *CH <sub>2</sub>                  | 0.62           | 0.07        | 0.64           |
| *CH <sub>3</sub>                  | 0.81           | 0.17        | 0.90           | *CH <sub>3</sub>                  | 0.87           | 0.12        | 0.92           |
| *CH <sub>4</sub>                  | 1.07           | 0.34        | 1.24           | *CH <sub>4</sub>                  | 1.37           | 0.13        | 1.43           |
| *O*                               | 0.06           | 0.04        | 0.07           | *O*                               | 0.06           | 0.04        | 0.08           |
| *OH                               | 0.30           | 0.10        | 0.34           | *OH                               | 0.34           | 0.07        | 0.37           |
| *H <sub>2</sub> O                 | 0.62           | 0.18        | 0.70           | *H <sub>2</sub> O                 | 0.57           | 0.15        | 0.64           |

Each step of photochemistry is treated as the simultaneous transfer of proton-electron pairs. For

example, the reaction mechanism for CO<sub>2</sub> reduction to CO is illustrated below,

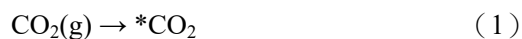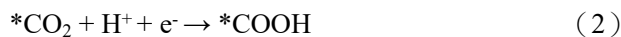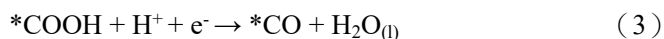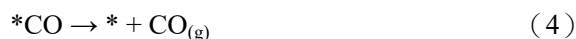

where \* stands for the adsorption site. Using the state of gaseous CO<sub>2</sub> which is unbound above surface as a reference, the Gibbs free energy is represented as,

$$\Delta G[* \text{CO}_2] = G[* \text{CO}_2] - (G[*] + G[\text{CO}_2])$$

$$\Delta G[* \text{COOH}] = G[* \text{COOH}] - (G[*] + G[\text{CO}_2] + G[\text{H}])$$

$$\Delta G[* \text{CO}] = G[* \text{CO}] + G[\text{H}_2\text{O}] - (G[*] + G[\text{CO}_2] + 2G[\text{H}])$$

$$\Delta G[\text{CO}] = G[\text{CO}] + G[\text{H}_2\text{O}] - (G[\text{CO}_2] + 2G[\text{H}])$$

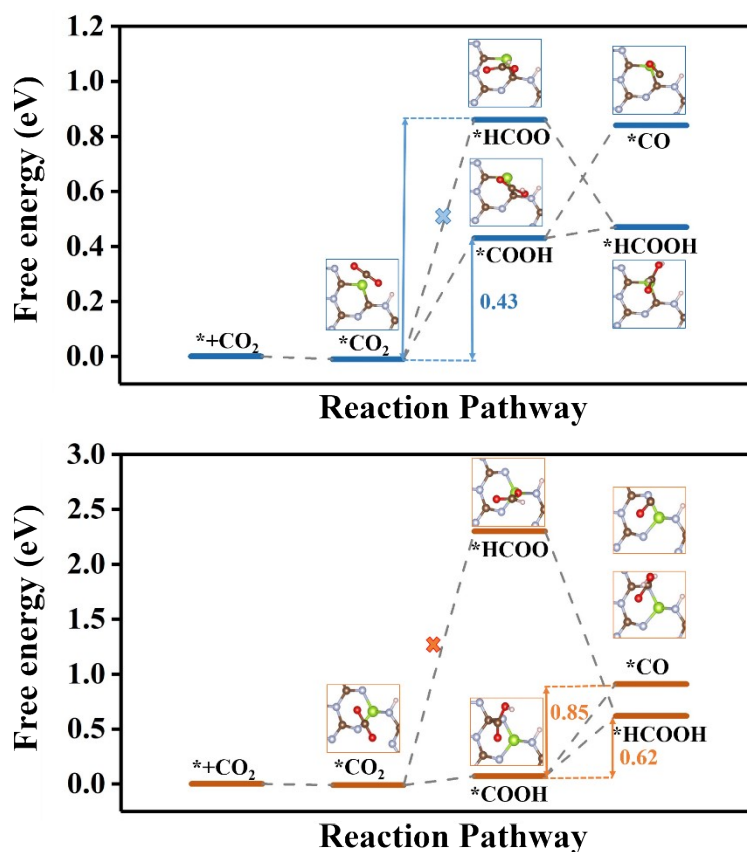

**Fig. S12.** Free energy diagrams for CO<sub>2</sub> reducing to CO and HCOOH via a 2-ele process on (a) SeN<sub>2</sub> (b) SeC<sub>3</sub>.



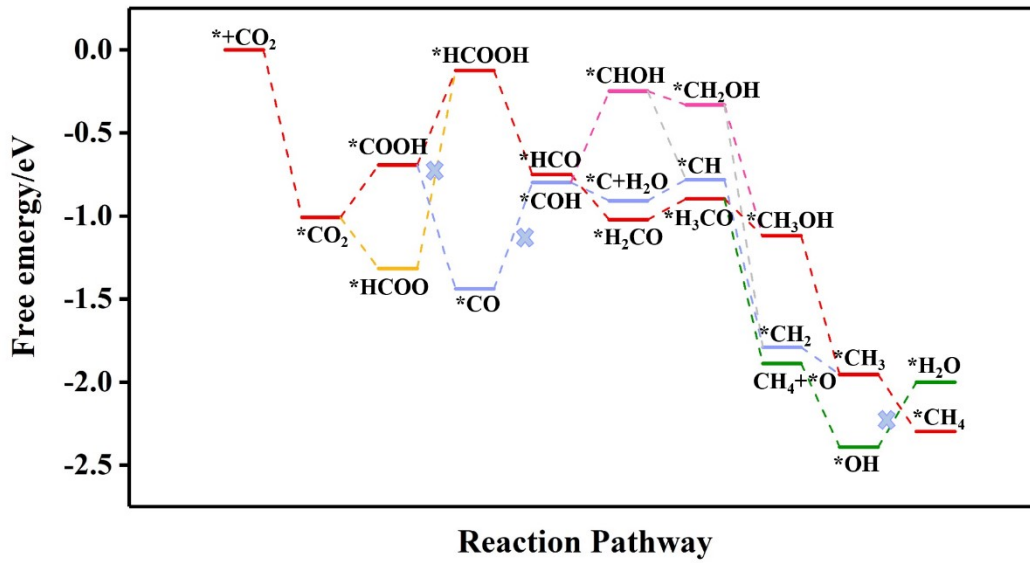

Fig. S13. Free-energy profile for CH<sub>3</sub>OH and CH<sub>4</sub> production of CRR on Co<sub>4</sub>@SeN<sub>2</sub>.

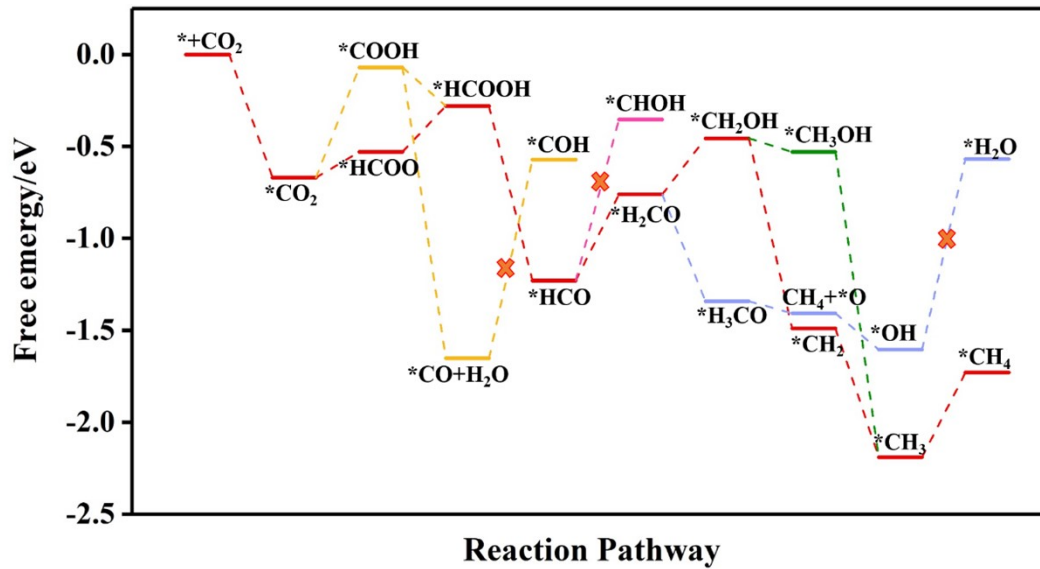

Fig. S14. Free-energy profile for CH<sub>3</sub>OH and CH<sub>4</sub> production of CRR on Co<sub>4</sub>@SeC<sub>3</sub>.
